# Supplementary material
Source: publisher site journal article supplement (https://www.dovepress.com/article/482596)
Supplement: Supplementary file 1 [file get_supplementary_file.php]

Supplementary Materials

**S1**

MINOCA Diagnostic Criteria:

The diagnosis of MINOCA was established based on the recognized criteria published by the American Heart Association in 2019,[ which encompassed a set of defined parameters:(i)In acute myocardial infarction (modified from the criteria set out in Fourth universal definition of myocardial infarction (2018)),1 there is a dynamic evolution of cardiac troponin values (cTn) with at least one value above the 99th percentile upper reference limit (URL), and there is unequivocal clinical evidence of at least one of the following types of infarction: a) symptoms of myocardial ischemia; b) New ischemic electrocardiogram changes; c) Pathological Q wave appears; d) Decreased viable myocardia or abnormal new ventricular wall motion due to ischemic causes confirmed by imaging;e) Intracoronary thrombosis is confirmed by angiography or autopsy. (ii) Coronary angiography-confirmed nonobstructive coronary artery lesions, defined as coronary angiography-indicated nonobstructive lesions in major epicardial vessels (no stenosis >50% in any of the major coronary arteries). This includes patients with the following categories, a) normal coronary arteries (no stenosis seen on angiography); b) mild coronary lumen irregularity (stenosis <30% visible on angiography); and c) moderate atherosclerotic coronary artery lesions (30% < stenosis <50%). (iii) There is no alternative diagnosis for the presenting condition; alternative diagnoses include, but are not limited to, non-ischemic etiologies such as sepsis, pulmonary thromboembolism, or myocarditis.

**S2**

Other Clinical Diagnosis Diagnostic Criteria:

According to the 2019 ESC Guidelines on diabetes, pre-diabetes, and cardiovascular diseases, diabetes was defined as a previous diagnosis of diabetes or active treatment with antidiabetic medication, or presenting typical symptoms of diabetes along with random blood glucose ≥11.1 mmol/L(≥200 mg/dL) or fasting blood glucose (FBG) ≥7.0 mmol/L or 2 h blood glucose after oral glucose tolerance test ≥11.1 mmol/L or HbA1c≥6.5% (48 mmol/mol).2 Hypertension was defined as systolic/diastolic blood pressure≥140/90 mmHg over three measurements or a previous diagnosis and current use of antihypertensive drugs. In line with the 2019 ESC/EAS Guidelines for the management of dyslipidaemias, patients whose previous diagnosis and current use of lipid regulation agents or who fall short of the target treatment goals for their lipid levels are deemed to have been diagnosed as dyslipidemia.3

The corresponding indexes were calculated from the same blood sample test report, SIRI was calculated as Absolute Neutrophil Count [ANC] *Absolute Monocyte Count [AMC]/Absolute Lymphocyte Count [ALC], NLR was calculated as ANC/ ALC, WMR was calculated as White Blood Cell Count /Mean Platelet Volume Ratio[MPV], NPR calculated as ANC/Absolute Platelet Count [APC].

1. Thygesen K, Alpert JS, Jaffe AS, et al. Fourth universal definition of myocardial infarction (2018). *Eur Heart J.* 2019;40(3):237-269.

2. Cosentino F, Grant PJ, Aboyans V, et al. 2019 ESC Guidelines on diabetes, pre-diabetes, and cardiovascular diseases developed in collaboration with the EASD. *Eur Heart J.* 2020;41(2):255-323.

3. Mach F, Baigent C, Catapano AL, et al. 2019 ESC/EAS Guidelines for the management of dyslipidaemias: lipid modification to reduce cardiovascular risk. *Eur Heart J.* 2020;41(1):111-188.

**S3**

ICs 11.020

C50

Standard for Health Industry of the People's Republic of China

WS/T347-2011

GuideIine For the calibration of bIood ceII assays

Published 2011-09-30 Implemented on 2012-04-10

The Ministry of Health of the People's Republic of China has issued.

1. Scope

This standard specifies the technical requirements for calibration of blood cell analysis.

This standard is applicable to clinical laboratories and related departments using blood analyzers.

1. Terms and Definitions

The following terms and definitions are applicable to this document.

2.1 Hematology Analyzer: It is mainly used for detecting human blood specimens, which is an instrument capable of qualitatively and quantitatively analyzing the formed components in the blood and providing relevant information.

2.2 Calibration: In a specified set of conditions, it refers to a series of operations that establish the relationship between the measured value indicated by a measuring instrument or measurement system, or the represented value by physical gauges or reference materials, and the corresponding reproduced value from standards.

[JJF1001— 1998, Definition 8.11]

2.3 Accuracy: The degree of consistency between a measured value and an acceptable reference value.

[ISo3534-1:1993, Definition 3.11]

2.4 Repeatability: In the same measurement conditions, the consistency between the results obtained from multiple consecutive measurements of the same object.

[JJF1001— 1998, Definition 5.6]

2.5 Bias: The difference between the expected value of experimental results and acceptable reference values.

[ISO3534-1:1993, Definition 3.13]

1. General Principles

3.1 Establish a calibration program for blood cell analysis suitable for use in our laboratory and document it. The content should include the source, name, traceability, and storage methods of the calibration materials used; specific methods and steps for calibration; when to perform calibration and who is responsible for implementation.

3.2 Regular calibration should be performed for each blood analyzer.

3.3 Calibration should be conducted separately when using different sampling modes on the same instrument.

3.4 After calibration of the blood analyzer, in order to monitor whether there is any drift in the detection results of the instrument, internal quality control should be carried out.

4. Performance Requirements Before Calibration

4.1 Background count: should meet the performance requirements indicated in the instrument manual.

4.2 Carryover rate: should meet the performance requirements indicated in the instrument manual.

4.3 Precision: should meet the performance requirements indicated in the instrument manual, while also meeting clinical needs.

4.4 Linearity requirement: should meet the performance requirements indicated in the instrument manual, while also meeting clinical needs.

5. Calibrated environmental conditions

The ambient temperature should be within the range of 18℃ to 25℃.

6. Calibrant

6.1 Source of Calibration Standards

6.1.1 Calibrant recommended by the manufacturer.

6.1.2 Fresh blood with traceability to reference methods provided by the calibration laboratory.

6.2 Selection of Calibrant

6.2.1 Laboratories using compatible detection systems may use Calibrant recommended by the manufacturer or fresh blood as Calibrant.

6.2.2 Laboratories using non-compatible detection systems can only use fresh blood for instrument calibration.

7. Calibration Items and Calibration Methods

7.1 Calibration Items

WBC, RBC, Hb, Plt, Hct/MCV.

7.2 Calibration Methods

7.2.1 Follow the calibration procedure specified in the instrument manual; if the specified procedure is incomplete, calibration can also be performed using the following procedure.

7.2.2 Instrument preparation: Clean all channels and test chambers of the instrument with a cleaning agent for 30 minutes treatment inside it first. Calibration can only be carried out when the background count and precision of the instrument are within the range indicated in the manual instructions.

7.2.3 Preparation of calibrant,

7.2.3.1 Use recommended calibrant provided by the instrument manufacturer.

7.2.3.1.1 After removing calibrant from refrigerator (at 2℃ ~8℃), let it sit at room temperature (18℃ ~25℃) for about 15 minutes to allow it to reach room temperature.

7.2.3.1.2 Check whether calibrant has exceeded its expiration date or if there is any deterioration or contamination.

7.2.3.1.3 Gently invert and mix calibrant repeatedly between palms of hands to ensure thorough mixing.

7.2.3.1.4 When opening lid, place gauze or soft paper underneath to absorb any splashed calibrant.

7.2.3.1.5 Combine two tubes of calibrant together after thorough mixing; one tube is used for testing while another tube is used for verifying calibration results.

7.2.3.2 Using fresh blood as calibrant.

7.2.3.2.1 Collect fresh blood from calibrator laboratory and distribute into three test tubes.

7.2.3.2.2 Take one tube from the middle and use a standard testing system to continuously test it 11 times. Calculate the mean value of the results from the 2nd to 11th tests as the definite value for fresh blood.

7.2.3.2.3 Use two other tubes of fresh blood as calibrant for instrument calibration and verification of calibration results.

7.2.4 Test the calibrant: take one tube of calibrant and perform continuous testing for 11 times, excluding the result of the first test to prevent contamination.

7.2.5 If the instrument does not have automatic calibration function, manually record each test result from the 2nd to 11th time in a worksheet. Calculate their mean value with an additional decimal place compared to daily reporting results.Instruments with automatic calibration function can directly obtain the mean value.

7.2.6 Compare this calculated mean value with the definite value of calibrant to determine if any adjustment is needed for the instrument.

7.2.6.1 Calculate percentage difference (ignoring positive or negative signs) between each parameter's mean value and its definite value using formula (1):

mean value- definite value

*100% …………….(1)

definite value

Compare the data in Table 1 with the standard data.

Table 1: Criteria for Calibration of Hematological Analysis

| 参 数 | 偏倚 | |
| --- | --- | --- |
| 一列 | 二列 |
| WBC | 1.5% | 10% |
| RBC | 1.0% | 10% |
| Hb | 1.0% | 10% |
| Hct | 2.0% | 10% |
| MCV | 1.0% | 10% |
| Plt | 3.0% | 15% |

7.2.6.2 Determination: If the differences between the average values of each parameter and the set values are all equal to or less than the numbers in the first column of the attached list no adjustment is required for the instrument, and the test data can be recorded as is.

If the differences between the average values of each parameter and the set values are greater than the numbers in the second column of the table, it is necessary to ask a repair technician to inspect and address any issues.

If the differences between average values of each parameter and set values fall within those listed in both columns of table, adjustments need to be made to calibrate instrument accordingly; calibration methods can follow instructions provided. If there is no automatic calibration function on instrument, divide set value by measured mean value to obtain calibration coefficient; multiply this coefficient with original coefficients on instrument for post-calibration coefficients; input these post-calibration coefficients into instrument instead of original ones.

7.2.7 Verification of Calibration Results: Thoroughly mix calibration material used for verification before conducting 11 repeated tests on instrument. Exclude results from first test and calculate mean value from second through eleventh tests; compare this calculated mean value with numbers listed in table again. If all parameters' differences are equal to or less than those listed in first column, it proves that calibration meets requirements successfully. If not achieved, repair personnel must be consulted for inspection.

8. Re-verification Interval

8.1 For laboratories conducting routine testing, it is required to calibrate the blood analyzer at least once every six months.

8.2 The following situations require calibration of the blood analyzer:

a) Before introducing the blood analyzer for use (new installation or reactivation of old equipment);

b) After replacing components during maintenance that may affect the accuracy of test results;

c) After relocating the instrument, when confirmation of reliable test results is needed;

d) When there is drift in the detection results of the indoor quality control display system (after excluding factors such as instrument malfunction and reagent influence);

e) When comparison results exceed allowable range.

f) Other situations where the laboratory deems calibration necessary.

9.Calibration of Related Equipment

All experimental equipment that may affect the accuracy of the results obtained from a blood analyzer must be calibrated before use. Examples include dilution devices (used with semi-automatic blood analyzers), scales (used for dilution device calibration), thermometers (used for monitoring refrigerator temperatures), and hygrometers (used for monitoring the humidity of the experimental environment).

References

[1] ICSH: The assignment of values to fresh blood used for calibrating automated blood cell

Counters. Clin. lab. Haemat. 1988.10.203-212

[2] ISO17511:2003 In vitro diagnostic medical devices-Measurement of quantities in biological samples— —Metrological traceability of values assigned to calibrators and control materials

[3] JJF1071-2000 Rules for Writing Household Measurement and Calibration Standards

[4] IS03534.1:1993 Statistics— Vocabulary and SymboIs-Part 1: probability and general

statistical terrns.

[5] JJF1001—1998 General Measurement Terms and Definitions.

**S4**

The detection method of NT-proBNP and the calibration or quality control procedures used

Sample collection: Patients should have their fasting venous blood collected on the morning after admission, within 24 hours of onset of symptoms. It is important to ensure a resting period of 10-15 minutes before drawing blood. The patient should be in a supine or semi-recumbent position.

Sample submission: Routine submission for testing.

Sample type: NT-proBNP testing can be performed on either plasma or serum, but the EDTA anticoagulated plasma values are approximately 10% lower than those obtained from heparin anticoagulated plasma or serum. It is recommended that the same type of sample be used for NT-proBNP testing within the same laboratory.

detection method：

immunoassay: Using chemiluminescence immunoassay (CLIA).

Quality control program:

Precision: It is required to meet the clinical treatment monitoring needs, with a target CV<10%.

Linear range: The upper limit of NT-proBNP detection is at least 30,000 ng/L, and the lower limit is at least 5 ng/L. For samples exceeding the upper limit of detection, the laboratory performs dilution verification tests to determine the specific concentration value reported in clinical reports.

Quality control products: All laboratories conducting NT-proBNP testing are required to select at least two levels of quality control products, including concentrations near the medical decision level, and participate in inter-laboratory proficiency testing activities organized by higher-level management institutions.

Quality control frequency: For institutions with multiple devices, other devices should be compared to the equipment determined to be qualified through inter-laboratory proficiency testing at least twice a year, with a requirement for detection bias between devices of less than 10%.

Calibration traceability: The diversification of BNP/NT-proBNP peptide segments is a challenge in achieving standardization. Currently, there are no reference materials available, making it impossible to achieve standardization of BNP/NT-proBNP. In the future, it may be possible to develop advanced reference methods and interchangeable reference materials for BNP/NT-proBNP, thereby reducing the impact of detection differences on comparability through standardization.
